# **COVID-19 Pandemic in University Hospital:**

## **Impact on Medical Training of Medical Interns**

WeiHonn Lim<sup>1¶\*</sup> ; Li Ying Teoh <sup>1¶</sup>; Kanesh Kumaran A/L Seevalingam<sup>1¶</sup> ; Shanggar  
Kuppusamy<sup>1¶</sup>

<sup>1</sup> Department of Surgery, University of Malaya Medical Centre, Kuala Lumpur, Malaysia

<sup>¶</sup> Current address: Department of Surgery, University of Malaya Medical Centre, Kuala  
Lumpur, Malaysia

\* Corresponding Author: WeiHonn Lim

Email Address : weihonn88@hotmail.com/ weihonn88@gmail.com

### Abbreviations

COVID-19, Coronavirus Disease 2019; HCW, healthcare workers; UMMC, University  
Malaya Medical Centre; OR, Odd Ratio

NOTE: This preprint reports new research that has not been certified by peer review and should not be used to guide clinical practice.

26 **Abstract**

27

28 **Introduction**

29 Coronavirus 2019 (COVID-19) has strike all nations hard since the end of year 2019,  
30 Malaysia unable to escape the fate as well. Healthcare system, financial growth, industrial  
31 development and educational programme are stunted. Inevitably, professional training and  
32 education are affected which include the medical training of medical interns.

33

34 **Methods**

35 This is a cross-sectional, pilot study to determine the impact of the pandemic on University  
36 Malaya Medical Centre (UMMC) medical interns. A survey which comprises 37-items was  
37 used. Data are analysed by Ordinal Logistic Regression Analysis.

38

39 **Results**

40 Medical interns feel that they lack clinical skills ( $p = 0.005$ ) and need more exposure in  
41 surgical operations ( $p = 0.029$ ). Some are satisfied with the introduction of triage ( $p = 0.024$ ),  
42 online teaching ( $p = 0.005$ ) and bedside teaching ( $p = 0.023$ ). Most of them think they are fit  
43 and ready to handle the pandemic ( $p = 0.012$  and  $0.025$  respectively) except first year medical  
44 interns ( $p = 0.029$ ). Some feel like their time are wasted ( $p < 0.05$ ) as they are involved in  
45 many non-clinical activities ( $p = 0.003$ ).

46

47 **Conclusion**

48 In summary, COVID-19 has a great impact on medical training amongst medical interns.  
49 Alternative measures should be taken to minimize the interruption in training of our future  
50 leaders in medical field.

51

## 52 **Introduction/ Background**

53

54 COVID-19 mercilessly invades the globe with its virus and causes a havoc globally.

55 [1] In order to face this pandemic crisis, healthcare field has suffered the most with its limited  
56 resources, burnt-out healthcare workers (HCW) and sudden raise in workloads.[2, 3]  
57 Malaysia unavoidably suffered similar fate since March 2020 and received a massive hit from  
58 this pandemic. In response to this pandemic crisis, Malaysia has implemented Movement  
59 Control Order (MCO) from 18<sup>th</sup> March 2020 in several stages, and currently we are in the  
60 Recovery Period of MCO.[4] To curb the spreading of COVID-19, several measures are  
61 implemented to contain the disease by alternating the current medical training from  
62 undergraduate to medical interns: rescheduling clinic appointment and elective operations to  
63 reduce unaffected populations from contracting COVID-19[5-7]; reshuffling HCW to  
64 overcome shortage of staffs especially in Emergency Department; suspension of bedside  
65 clinical teaching to avoid transmission within HCW; cancellation of workshop and  
66 conference to avoid mass gathering.[8, 9] Inevitably, medical training for medical interns are  
67 affected. [10, 11]

68

69 The medical interns, also known as the House Officers in Malaysia, comprise of  
70 medical fresh graduates who must complete their two-year medical training. During this  
71 period of training, they rotate to six compulsory clinical postings namely Internal Medicine,  
72 Surgery, Obstetrics and Gynaecology, Orthopaedic and Paediatric departments. Addition to  
73 that is a choice of a posting in either Psychiatry, Emergency Medicine or Anaesthesiology  
74 department. They are required to complete at least four months rotation in each department  
75 with a certain expectation in their clinical exposure to be fulfilled under full supervision by  
76 their specialists and consultants. [12]This two-year medical training is tough and medical

77 interns have to withstand a great level great level of work stress while trying to gain more  
78 clinical experiences during the posting in each department.[13, 14]

79

80 As a teaching university hospital in Malaysia, University Malaya Medical Centre  
81 (UMMC) has been gazetted as one of the designated COVID centres. To fulfil its role, many  
82 changes have been adapted to accommodate the surge of COVID cases: from rescheduling  
83 clinic appointments and elective operations to deployment of more HCW to Emergency  
84 Department as “frontliners” and gazetting more designated COVID wards to manage infected  
85 cases. [15] Furthermore, due to shortage of medical equipment such as personal protective  
86 equipment (PPE) faced by UMMC initially, limitation to numbers of healthcare workers to  
87 have direct contact with patients were issued. Indirectly, medical interns who are supposed to  
88 gain knowledge and experiences in managing patients are greatly affected.[10] Additionally,  
89 they have to work under pressures, heighten their vigilance during their works and worry  
90 about getting inflicted with diseases. All these invisible hurdles not only affected their mental  
91 states but their performances and their ability to learn. Nevertheless, the degree of impact  
92 from this pandemic on the medical interns needs to be addressed to ensure a continuous and  
93 effective clinical training.

94

## 95 **Methodology**

96 A survey form is created and drafted in English language which composed of two  
97 components: demographic status (gender, ethnics, age, number of posting and qualification  
98 attained) and the questionnaire itself which comprised of five domains: physical health,  
99 emotion/ psychological coping, social/ relationship handling, medical training progression  
100 and preparedness in handling a pandemic situation. The questionnaire uses a five-response  
101 Likert Scale: ranging from 1 to 5 which represent totally disagree, disagree, neutral, agree  
102 and strongly agree respectively.

103           The questionnaire is uploaded to an online survey form - Google Form and a link is  
104 generated. The invitation for participation in the study is sent by email and electronic devices  
105 via WhatsApp, with the link to assess the questionnaire. Electronic Participant Information  
106 Sheets (PIS) are provided in the first page of the survey form. All participations are self-  
107 voluntary whereby they can choose not to participate if they have disagreed to include their  
108 responses in this study result. The questionnaire is self-administered by the participants in  
109 anonymity. Participation is opened from April 2020 to June 2020.

110           Subsequently, all data are downloaded into Excel form and transcript into SPSS  
111 Version 16.0. Demographic data are summarised by descriptive analysis. Association  
112 between demographic factors and each item in the questionnaire is analysed by using Ordinal  
113 Logistic Regression Analysis. Subsequently, data are analysed using Generalised Linear  
114 Models where demographic data were entered as the factor and all items in the questionnaire  
115 were keyed in as dependent variables. For each factor, groups with majority numbers are  
116 made as comparators to avoid potential bias: Female, Malay ethnic and local graduates are  
117 listed as comparators to others in their respective groups.

118

## 119 **Results**

120           There are total of 236 responses recorded in our Google Form. Out of these numbers, 232  
121 participants consented to join which contributes 98.3% of response rate while only four of  
122 them declined to participate. Of 232 participants who agreed to participate in this survey,  
123 majority are females (62.1%) and of Malay ethnics (45.3%). Most of them attained their  
124 medical degrees from local university (60.8%) and had completed at least 3 postings (56.9%).

125

126

127

128

129 **Table 1: Basic Demographic Data of Medical Interns**

130

| <i>Variables</i>                            | <i>Male</i><br>( <i>n</i> = 88) | <i>Female</i><br>( <i>n</i> = 144) | <i>Total</i><br>( <i>n</i> = 232) |
|---------------------------------------------|---------------------------------|------------------------------------|-----------------------------------|
| <b>Age, years (SD)</b>                      | <b>27 (1.38)</b>                | <b>27 (1.74)</b>                   | <b>27 (1.6)</b>                   |
| <b>Ethnics, <i>n</i> (%)</b>                |                                 |                                    |                                   |
| Malay                                       | 33 (14.2)                       | 72 (31.0)                          | 105 (45.3)                        |
| Chinese                                     | 35 (15.1)                       | 43 (18.5)                          | 78 (33.6)                         |
| Indian                                      | 17 (7.3)                        | 24 (10.3)                          | 41 (17.7)                         |
| Others                                      | 3 (1.3)                         | 5 (2.2)                            | 8 (3.4)                           |
| <b>Qualification Attained, <i>n</i> (%)</b> |                                 |                                    |                                   |
| Local University                            | 56 (24.1)                       | 85 (36.6)                          | 141 (60.8)                        |
| Overseas University                         | 18 (7.8)                        | 44 (19.0)                          | 62 (26.7)                         |
| Twinning Programmes                         | 14 (6.0)                        | 15 (6.5)                           | 29 (12.5)                         |
| <b>Number of Posting, <i>n</i> (%)</b>      |                                 |                                    |                                   |
| 1                                           | 13 (5.6)                        | 14 (6.0)                           | 27 (11.6)                         |
| 2                                           | 14 (6.0)                        | 25 (10.8)                          | 39 (16.8)                         |
| 3                                           | 24 (10.3)                       | 42 (18.1)                          | 66 (28.4)                         |
| 4                                           | 20 (8.6)                        | 36 (15.5)                          | 56 (24.1)                         |
| 5                                           | 6 (2.6)                         | 11 (4.7)                           | 17 (7.3)                          |
| 6                                           | 11 (4.7)                        | 16 (6.9)                           | 27 (11.6)                         |

131

132



134

**Table 2: Association between Demographic Factors with Medical Training Progress**

135

| Questions                                                    | Gender            |                                     | Ethnic                 |                                     | Location of Qualification |                                     | Number of Posting      |                                     |
|--------------------------------------------------------------|-------------------|-------------------------------------|------------------------|-------------------------------------|---------------------------|-------------------------------------|------------------------|-------------------------------------|
|                                                              | Estimates<br>(OR) | p-value<br>(Confidence<br>Interval) | Estimates<br>(OR)      | p-value<br>(Confidence<br>Interval) | Estimates<br>(OR)         | p-value<br>(Confidence<br>Interval) | Estimates<br>(OR)      | p-value<br>(Confidence<br>Interval) |
| I feel that I am lacking experiences in hands-on procedures. | -0.843<br>(0.431) | 0.001<br>(0.262-0.707)              | E1 = -1.703<br>(0.182) | 0.100<br>(0.050-0.660)              | G1 = 0.473<br>(1.605)     | 0.197<br>(0.782-3.294)              | P1 = -0.276<br>(0.759) | 0.586<br>(0.281-2.049)              |
|                                                              |                   |                                     | E2 = -0.743<br>(0.476) | 0.031<br>(0.242-0.936)              | G2 = 0.801<br>(2.228)     | 0.005<br>(1.273-3.901)              | P2 = -0.608<br>(0.544) | 0.185<br>(0.221-1.339)              |
|                                                              |                   |                                     | E3 = -0.970<br>(0.907) | 0.720<br>(0.534-1.542)              |                           |                                     | P3 = -0.861<br>(0.423) | 0.040<br>(0.186-0.961)              |
|                                                              |                   |                                     |                        |                                     |                           |                                     | P4 = 0.202<br>(1.224)  | 0.635<br>(0.532-2.817)              |
|                                                              |                   |                                     |                        |                                     |                           |                                     | P5 = 0.430<br>(1.538)  | 0.484<br>(0.460-5.138)              |
| I wish we had more surgical emergency operations.            | -0.567<br>(0.567) | 0.024<br>(0.347-0.928)              | E1 = -1.335<br>(0.263) | 0.055<br>(0.067-1.027)              | G1 = 0.253<br>(1.288)     | 0.504<br>(0.612-2.709)              | P1 = -1.118<br>(0.327) | 0.024<br>(0.124-0.861)              |
|                                                              |                   |                                     | E2 = -0.096            | 0.776                               | G2 = 0.626                | 0.029                               | P2 = -1.176            | 0.009                               |



|                                                                                            |                  |                        |                        |                          |                            |                        |                        |                        |                        |
|--------------------------------------------------------------------------------------------|------------------|------------------------|------------------------|--------------------------|----------------------------|------------------------|------------------------|------------------------|------------------------|
|                                                                                            |                  |                        | (0.909)                | (0.470<br>-1.758)        | (1.871)                    | (1.064-3.288)          | (0.308)                | (0.127-0.747)          |                        |
|                                                                                            |                  |                        | E3 = -0.216<br>(0.806) | 0.432<br>(0.471-1.380)   |                            |                        | P3 = -0.768<br>(0.464) | 0.064<br>(0.206-1.047) |                        |
|                                                                                            |                  |                        |                        |                          |                            |                        | P4 = -0.160<br>(0.852) | 0.710<br>(0.367-1.977) |                        |
|                                                                                            |                  |                        |                        |                          |                            |                        | P5 = -0.815<br>(0.443) | 0.155<br>(0.144-1.361) |                        |
| I am satisfied with the current<br>online teaching for HOs<br>(department/division level). | 0.059<br>(1.061) | 0.812<br>(0.653-1.722) | E1 = 0.971<br>(2.639)  | 0.180 (0.640-<br>10.888) | G1 = -<br>0.222<br>(0.801) | 0.553<br>(0.386-1.665) | P1 = 0.634<br>(1.884)  | 0.214<br>(0.694-5.116) |                        |
|                                                                                            |                  |                        | E2 = -0.278<br>(0.758) | 0.409<br>(0.392-1.465)   | G2 = -<br>0.142<br>(0.868) | 0.610<br>(0.502-1.498) | P2 = 0.543<br>(1.721)  | 0.240<br>(0.695-4.257) |                        |
|                                                                                            |                  |                        | E3 = -0.513<br>(0.599) | 0.065<br>(0.347-1.033)   |                            |                        |                        | P3 = 1.227<br>(3.411)  | 0.005<br>(1.455-7.996) |
|                                                                                            |                  |                        |                        |                          |                            |                        |                        | P4 = 0.151<br>(1.163)  | 0.728<br>(0.495-2.732) |
|                                                                                            |                  |                        |                        |                          |                            |                        |                        | P5 = 0.395             | 0.505                  |

|                                                                              |                   |                        |                        |                        |                            |                        |                        |                        |
|------------------------------------------------------------------------------|-------------------|------------------------|------------------------|------------------------|----------------------------|------------------------|------------------------|------------------------|
|                                                                              |                   |                        |                        |                        |                            |                        | (1.485)                | (0.464-4.747)          |
| I do not receive adequate bedside teaching from my MOs/Lecturers/Consultants | -0.303<br>(0.739) | 0.213<br>(0.459-1.190) | E1 = -0.883<br>(0.414) | 0.212<br>(0.103-1.654) | G1 = 0.358<br>(1.430)      | 0.328<br>(0.698-2.932) | P1 = 0.031<br>(1.032)  | 0.950<br>(0.390-2.729) |
|                                                                              |                   |                        | E2 = -0.307<br>(0.736) | 0.372<br>(0.375-1.443) | G2 = 0.490<br>(1.632)      | 0.082<br>(0.940-2.835) | P2 = -0.286<br>(0.751) | 0.535<br>(0.304-1.854) |
|                                                                              |                   |                        | E3 = 0.235<br>(1.265)  | 0.376<br>(0.752-2.126) |                            |                        | P3 = -0.963<br>(0.382) | 0.023<br>(0.166-0.875) |
|                                                                              |                   |                        |                        |                        |                            |                        | P4 = -0.107<br>(0.898) | 0.803<br>(0.387-2.084) |
|                                                                              |                   |                        |                        |                        |                            |                        | P5 = -0.523<br>(0.593) | 0.360<br>(0.194-1.814) |
| I learn about the triage and management of patients during a pandemic.       | 0.422<br>(1.524)  | 0.095<br>(0.930-2.499) | E1 = 0.256<br>(1.291)  | 0.688<br>(0.371-4.493) | G1 = 0.146<br>(1.157)      | 0.700<br>(0.550-2.433) | P1 = -0.935<br>(0.393) | 0.072<br>(0.142-1.087) |
|                                                                              |                   |                        | E2 = 0.777<br>(2.175)  | 0.024<br>(1.108-4.270) | G2 = -<br>0.727<br>(0.484) | 0.010<br>(0.278-0.842) | P2 = -0.675<br>(0.509) | 0.159<br>(0.199-1.301) |
|                                                                              |                   |                        | E3 = 0.152<br>(1.165)  | 0.579<br>(0.679-1.997) |                            |                        | P3 = 0.026<br>(1.026)  | 0.953<br>(0.431-2.445) |
|                                                                              |                   |                        |                        |                        |                            |                        | P4 = -1.064            | 0.020                  |

|                                                                               |                  |                        |                        |                        |                       |                        |                        |                        |
|-------------------------------------------------------------------------------|------------------|------------------------|------------------------|------------------------|-----------------------|------------------------|------------------------|------------------------|
|                                                                               |                  |                        |                        |                        |                       |                        | (0.345)                | (0.141-0.844)          |
|                                                                               |                  |                        |                        |                        |                       |                        | P5 = 0.539<br>(1.714)  | 0.375<br>(0.521-5.634) |
| I have been exposed to the importance of audit/research during this pandemic. | 0.023<br>(1.023) | 0.928<br>(0.624-1.676) | E1 = 0.139<br>(1.149)  | 0.830<br>(0.322-4.096) | G1 = 0.129<br>(1.137) | 0.727<br>(0.552-2.341) | P1 = -0.089<br>(0.914) | 0.862<br>(0.334-2.506) |
|                                                                               |                  |                        | E2 = 0.402<br>(1.495)  | 0.249<br>(0.754-2.964) | G2 = 0.080<br>(1.083) | 0.776<br>(0.624-1.881) | P2 = -0.294<br>(0.745) | 0.519<br>(0.305-1.820) |
|                                                                               |                  |                        | E3 = -0.176<br>(0.839) | 0.520<br>(0.490-1.434) |                       |                        | P3 = 0.742<br>(2.101)  | 0.082<br>(0.909-4.856) |
|                                                                               |                  |                        |                        |                        |                       |                        | P4 = -0.038<br>(0.963) | 0.931<br>(0.412-2.251) |
|                                                                               |                  |                        |                        |                        |                       |                        | P5 = 0.877<br>(2.402)  | 0.149<br>(0.731-7.896) |

136

137

138

*\*E1 = other ethnics; E2 = Indian; E3 = Chinese; G1 = twining program; G2 = overseas; P1= 1<sup>st</sup> posting; P2 = 2<sup>nd</sup> posting; P3= 3<sup>rd</sup> posting; P4 = 4<sup>th</sup> posting; P5 = 5<sup>th</sup> posting; HO =house officer; MO = medical officer*

139

140

141

142 **Table 3: Association between Demographic with Preparedness in Handling A Pandemic**

143

| Questions                                                | Gender            |                                     | Ethnic                 |                                     | Location of Qualification |                                     | Number of Posting      |                                     |
|----------------------------------------------------------|-------------------|-------------------------------------|------------------------|-------------------------------------|---------------------------|-------------------------------------|------------------------|-------------------------------------|
|                                                          | Estimates<br>(OR) | p-value<br>(Confidence<br>Interval) | Estimates<br>(OR)      | p-value<br>(Confidence<br>Interval) | Estimates<br>(OR)         | p-value<br>(Confidence<br>Interval) | Estimates<br>(OR)      | p-value<br>(Confidence<br>Interval) |
| I think I am not<br>physically fit for<br>this pandemic. | -0.446<br>(0.640) | 0.082<br>(0.388-1.058)              | E1 = -0.850<br>(0.427) | 0.197<br>(0.117-1.555)              | G1 = 0.272<br>(1.313)     | 0.493<br>(0.603-2.857)              | P1 = 0.525<br>(1.691)  | 0.301<br>(0.625-4.575)              |
|                                                          |                   |                                     | E2 = -0.907<br>(0.404) | 0.012<br>(0.198-0.822)              | G2 = 0.503<br>(1.653)     | 0.079<br>(0.944-2.894)              | P2 = -0.026<br>(0.974) | 0.954<br>(0.401-2.368)              |
|                                                          |                   |                                     | E3 = -0.589<br>(0.555) | 0.034<br>(0.322-0.958)              |                           |                                     | P3 = -0.531<br>(0.588) | 0.198<br>(0.263-1.318)              |
|                                                          |                   |                                     |                        |                                     |                           |                                     | P4 = 0.181<br>(1.198)  | 0.667<br>(0.526-2.726)              |
|                                                          |                   |                                     |                        |                                     |                           |                                     | P5 = -0.678<br>(0.507) | 0.239<br>(0.164-1.568)              |
| I feel that wearing<br>PPE may not<br>prevent us from    | -0.241<br>(0.786) | 0.344<br>(0.477-1.295)              | E1 = 0.744<br>(2.103)  | 0.248<br>(0.596-7.417)              | G1 = 0.273<br>(1.314)     | 0.470<br>(0.627-2.753)              | P1 = -0.245<br>(0.783) | 0.623<br>(0.295-2.079)              |
|                                                          |                   |                                     | E2 = 0.783             | 0.025                               | G2 = -0.125               | 0.664                               | P2 = -0.709            | 0.119                               |

|                                                                     |                   |                        |                        |                        |                        |                        |                        |                        |
|---------------------------------------------------------------------|-------------------|------------------------|------------------------|------------------------|------------------------|------------------------|------------------------|------------------------|
| contracting<br>COVID-19                                             |                   |                        | (2.189)                | (1.104-4.340)          | (0.882)                | (0.500-1.555)          | (0.492)                | (0.202-1.199)          |
|                                                                     |                   |                        | E3 = 0.577<br>(1.781)  | 0.043<br>(1.019-3.113) |                        |                        | P3 = -0.857<br>(0.424) | 0.044<br>(0.184-0.977) |
|                                                                     |                   |                        |                        |                        |                        |                        | P4 = -0.579<br>(0.560) | 0.187<br>(0.237-1.326) |
|                                                                     |                   |                        |                        |                        |                        |                        | P5 = -0.565<br>(0.569) | 0.329<br>(0.183-1.765) |
| I feel that PPE is<br>not readily<br>available for<br>junior staff. | -0.578<br>(0.561) | 0.019<br>(0.347-0.908) | E1 = -0.715<br>(0.489) | 0.218<br>(0.157-1.525) | G1 = -0.302<br>(0.739) | 0.397<br>(0.367-1.488) | P1 = 0.074<br>(1.077)  | 0.880<br>(0.411-2.818) |
|                                                                     |                   |                        | E2 = -0.124<br>(0.884) | 0.720<br>(0.449-1.740) | G2 = 0.436<br>(1.547)  | 0.112<br>(0.904-2.649) | P2 = 0.614<br>(1.848)  | 0.176<br>(0.759-4.499) |
|                                                                     |                   |                        | E3 = 0.210<br>(1.234)  | 0.431<br>(0.732-2.081) |                        |                        | P3 = -0.072<br>(1.074) | 0.864<br>(0.474-2.432) |
|                                                                     |                   |                        |                        |                        |                        |                        | P4 = 0.478<br>(1.614)  | 0.268<br>(0.692-3.762) |
|                                                                     |                   |                        |                        |                        |                        |                        | P5 = -0.005<br>(0.995) | 0.993<br>(0.320-3.091) |
| I am involved in<br>many non-clinical                               | -0.155<br>(0.856) | 0.526<br>(0.530-1.384) | E1 = 0.485<br>(1.624)  | 0.464<br>(0.443-5.949) | G1 = 0.127<br>(1.135)  | 0.724<br>(0.562-2.295) | P1 = -0.121<br>(0.886) | 0.813<br>(0.324-2.420) |

|                                                                                  |                  |                        |                        |                        |                        |                        |                        |                        |
|----------------------------------------------------------------------------------|------------------|------------------------|------------------------|------------------------|------------------------|------------------------|------------------------|------------------------|
| works during this pandemic.                                                      |                  |                        | E2 = 0.510<br>(1.665)  | 0.124<br>(0.870-3.187) | G2 = -0.114<br>(0.892) | 0.679<br>(0.519-1.533) | P2 = -0.215<br>(0.807) | 0.652<br>(0.317-2.051) |
|                                                                                  |                  |                        | E3 = 0.803<br>(2.232)  | 0.003<br>(1.305-3.819) |                        |                        | P3 = -0.315<br>(0.730) | 0.468<br>(0.312-1.708) |
|                                                                                  |                  |                        |                        |                        |                        |                        | P4 = 0.330<br>(1.391)  | 0.461<br>(0.578-3.348) |
|                                                                                  |                  |                        |                        |                        |                        |                        | P5 = 0.739<br>(2.094)  | 0.211<br>(0.658-6.668) |
| I think we are being sent out as the frontliners as we are the most junior staff | 0.024<br>(1.024) | 0.924<br>(0.631-1.663) | E1 = -1.156<br>(0.315) | 0.062<br>(0.093-1.061) | G1 = -0.651<br>(0.521) | 0.081<br>(0.251-1.085) | P1 = -0.463<br>(0.630) | 0.357<br>(0.235-1.684) |
|                                                                                  |                  |                        | E2 = -0.504<br>(0.604) | 0.135<br>(0.312-1.170) | G2 = -0.553<br>(0.575) | 0.055<br>(0.327-1.013) | P2 = -0.320<br>(0.726) | 0.497<br>(0.288-1.831) |
|                                                                                  |                  |                        | E3 = 0.229<br>(1.258)  | 0.405<br>(0.733-2.160) |                        |                        | P3 = -0.516<br>(0.597) | 0.229<br>(0.258-1.383) |
|                                                                                  |                  |                        |                        |                        |                        |                        | P4 = -0.391<br>(0.676) | 0.378<br>(0.284-1.612) |
|                                                                                  |                  |                        |                        |                        |                        |                        | P5 = -1.772<br>(0.170) | 0.004<br>(0.051-0.566) |
| I think we should                                                                | 0.304            | 0.231                  | E1 = -0.215            | 0.739                  | G1 = 0.681             | 0.074                  | P1 = -0.686            | 0.174                  |

|                                                                     |                   |                        |                        |                        |                       |                        |                        |                        |
|---------------------------------------------------------------------|-------------------|------------------------|------------------------|------------------------|-----------------------|------------------------|------------------------|------------------------|
| be considered as part of the COVID task force during this pandemic. | (1.356)           | (0.824-2.232)          | (0.807)                | (0.228-2.851)          | (1.976)               | (0.936-4.173)          | (0.503)                | (0.187-1.356)          |
|                                                                     |                   |                        | E2 = -0.010<br>(0.990) | 0.976<br>(0.500-1.959) | G2 = 0.323<br>(1.381) | 0.263<br>(0.785-2.429) | P2 = -0.856<br>(0.425) | 0.060<br>(0.174-1.038) |
|                                                                     |                   |                        | E3 = -0.370<br>(0.691) | 0.188<br>(0.399-1.198) |                       |                        | P3 = -0.208<br>(0.812) | 0.615<br>(0.362-1.826) |
|                                                                     |                   |                        |                        |                        |                       |                        | P4 = -0.093<br>(0.911) | 0.828<br>(0.392-2.115) |
|                                                                     |                   |                        |                        |                        |                       |                        | P5 = -0.783<br>(0.457) | 0.162<br>(0.153-1.369) |
| I think the time of the junior staff and resources are wasted       | -0.169<br>(0.845) | 0.492<br>(0.522-1.366) | E1 = -1.872<br>(0.154) | 0.010<br>(0.037-0.636) | G1 = 0.689<br>(1.992) | 0.058<br>(0.978-4.055) | P1 = 0.301<br>(1.352)  | 0.531<br>(0.527-3.466) |
|                                                                     |                   |                        | E2 = -0.131<br>(0.877) | 0.695<br>(0.454-1.692) | G2 = 1.045<br>(2.843) | 0.000<br>(1.606-5.033) | P2 = -0.198<br>(0.820) | 0.653<br>(0.345-1.948) |
|                                                                     |                   |                        | E3 = -0.393<br>(0.675) | 0.145<br>(0.397-1.146) |                       |                        | P3 = -0.425<br>(0.653) | 0.295<br>(0.295-1.448) |
|                                                                     |                   |                        |                        |                        |                       |                        | P4 = 0.239<br>(1.270)  | 0.569<br>(0.557-2.893) |
|                                                                     |                   |                        |                        |                        |                       |                        | P5 = -0.314<br>(0.731) | 0.571<br>(0.247-2.162) |

|                                                                                 |                  |                        |                        |                        |                        |                        |                        |                        |
|---------------------------------------------------------------------------------|------------------|------------------------|------------------------|------------------------|------------------------|------------------------|------------------------|------------------------|
| I wish to have a remuneration/ extra pay if being called in as the frontliners. | 0.228<br>(1.256) | 0.375<br>(0.759-2.077) | E1 = 0.136<br>(1.146)  | 0.845<br>(0.293-4.472) | G1 = -0.250<br>(0.779) | 0.501<br>(0.376-1.614) | P1 = -0.122<br>(0.885) | 0.812<br>(0.323-2.424) |
|                                                                                 |                  |                        | E2 = -0.558<br>(0.572) | 0.108<br>(0.290-1.131) | G2 = 0.563<br>(1.757)  | 0.053<br>(0.993-3.108) | P2 = -0.143<br>(0.866) | 0.761<br>(0.344-2.183) |
|                                                                                 |                  |                        | E3 = 0.172<br>(1.188)  | 0.545<br>(0.680-2.075) |                        |                        | P3 = -0.720<br>(0.487) | 0.096<br>(0.209-1.135) |
|                                                                                 |                  |                        |                        |                        |                        |                        | P4 = -0.491<br>(0.612) | 0.263<br>(0.259-1.447) |
|                                                                                 |                  |                        |                        |                        |                        |                        | P5 = -0.087<br>(0.916) | 0.880<br>(0.294-2.860) |
| I think I am ready to be part of the 'frontliners'                              | 0.348<br>(1.416) | 0.170<br>(0.862-2.328) | E1 = -0.318<br>(0.728) | 0.653<br>(0.182-2.914) | G1 = 0.052<br>(1.053)  | 0.894<br>(0.493-2.251) | P1 = -1.115<br>(0.328) | 0.029<br>(0.121-0.890) |
|                                                                                 |                  |                        | E2 = -0.303<br>(0.739) | 0.383<br>(0.374-1.460) | G2 = 0.655<br>(1.924)  | 0.025<br>(1.085-3.411) | P2 = -1.452<br>(0.234) | 0.002<br>(0.093-0.587) |
|                                                                                 |                  |                        | E3 = -0.243<br>(0.785) | 0.388<br>(0.453-1.360) |                        |                        | P3 = -0.768<br>(0.464) | 0.077<br>(0.198-1.088) |
|                                                                                 |                  |                        |                        |                        |                        |                        | P4 = -0.448<br>(0.639) | 0.308<br>(0.270-1.512) |
|                                                                                 |                  |                        |                        |                        |                        |                        | P5 = -0.437            | 0.457                  |



|                                                                   |                |                     |                    |                     |                     |                     |                     |                     |
|-------------------------------------------------------------------|----------------|---------------------|--------------------|---------------------|---------------------|---------------------|---------------------|---------------------|
|                                                                   |                |                     |                    |                     |                     |                     | (0.646)             | (0.204-2.042)       |
| It is easy to communicate with my team leaders/coordinators.      | 0.240 (1.271)  | 0.364 (0.758-2.132) | E1 = 0.196 (1.216) | 0.772 (0.323-4.587) | G1 = 0.436 (1.546)  | 0.293 (0.686-3.483) | P1 = -0.495 (0.610) | 0.353 (0.215-1.733) |
|                                                                   |                |                     | E2 = 0.569 (1.767) | 0.122 (0.860-3.631) | G2 = 0.413 (1.512)  | 0.173 (0.835-2.738) | P2 = -0.657 (0.518) | 0.174 (0.201-1.336) |
|                                                                   |                |                     | E3 = 0.049 (1.050) | 0.867 (0.593-1.859) |                     |                     | P3 = -0.100 (0.904) | 0.821 (0.379-2.158) |
|                                                                   |                |                     |                    |                     |                     |                     | P4 = -0.611 (0.543) | 0.176 (0.224-1.317) |
|                                                                   |                |                     |                    |                     |                     |                     | P5 = 0.512 (1.669)  | 0.424 (0.475-5.859) |
| The dissemination of information from the administrator is clear. | -0.380 (0.684) | 0.132 (0.417-1.121) | E1 = 0.172         | 0.801               | G1 = -0.367 (0.693) | 0.326 (0.333-1.442) | P1 = 0.566 (1.761)  | 0.259 (0.659-4.700) |
|                                                                   |                |                     | E2 = -0.371        | 0.281               | G2 = 0.842 (2.321)  | 0.004 (1.300-4.143) | P2 = 0.082 (1.086)  | 0.854 (0.451-2.612) |
|                                                                   |                |                     | E3 = -0.682        | 0.015               |                     |                     | P3 = 0.664 (1.943)  | 0.108 (0.864-4.368) |
|                                                                   |                |                     |                    |                     |                     |                     | P4 = 0.337 (1.400)  | 0.429 (0.608-3.222) |

|                                                                                                                |                   |                        |                        |                        |                        |                        |                        |                         |
|----------------------------------------------------------------------------------------------------------------|-------------------|------------------------|------------------------|------------------------|------------------------|------------------------|------------------------|-------------------------|
|                                                                                                                |                   |                        |                        |                        |                        |                        | P5 = 0.224<br>(1.251)  | 0.707<br>(0.389-4.025)  |
| I feel that I am not given an opportunity to voice out my opinion.                                             | 0.428<br>(1.535)  | 0.089<br>(0.937-2.513) | E1 = -1.036<br>(0.355) | 0.126<br>(0.094-1.337) | G1 = -0.055<br>(0.947) | 0.883<br>(0.457-1.961) | P1 = -0.116<br>(0.891) | 0.821<br>(0.328-2.418)  |
|                                                                                                                |                   |                        | E2 = -0.124<br>(0.884) | 0.712<br>(0.458-1.704) | G2 = -0.083<br>(0.920) | 0.771<br>(0.525-1.613) | P2 = 0.038<br>(1.038)  | 0.933<br>(0.435- 2.480) |
|                                                                                                                |                   |                        | E3 = 0.389<br>(1.475)  | 0.165<br>(0.852-2.554) |                        |                        | P3 = -0.858<br>(0.424) | 0.039<br>(0.188-0.957)  |
|                                                                                                                |                   |                        |                        |                        |                        |                        | P4 = 0.173<br>(1.189)  | 0.685<br>(0.516-2.741)  |
|                                                                                                                |                   |                        |                        |                        |                        |                        | P5 = 0.184<br>(1.202)  | 0.755<br>(0.378-3.829)  |
| I am willing to carry out the instructions given, knowing that these are well thought of by the administrator. | -0.118<br>(0.889) | 0.658<br>(0.529-1.495) | E1 = -0.046<br>(0.955) | 0.946<br>(0.250-3.650) | G1= -0.032<br>(0.969)  | 0.939<br>(0.434-2.165) | P1 = -0.346<br>(0.707) | 0.518<br>(0.248-2.020)  |
|                                                                                                                |                   |                        | E2 = 0.378<br>(1.459)  | 0.303<br>(0.711-2.992) | G2 = 0.413<br>(1.512)  | 0.170<br>(0.838-2.728) | P2 = -1.018<br>(0.361) | 0.036<br>(0.139-0.936)  |
|                                                                                                                |                   |                        | E3 = -0.118<br>(0.889) | 0.684<br>(0.504-1.569) |                        |                        | P3 = -0.500<br>(0.606) | 0.263<br>(0.252-1.457)  |
|                                                                                                                |                   |                        |                        |                        |                        |                        | P4 = -0.382            | 0.408                   |

|                                    |                  |                        |                        |                        |                        |                        |                        |                         |
|------------------------------------|------------------|------------------------|------------------------|------------------------|------------------------|------------------------|------------------------|-------------------------|
|                                    |                  |                        |                        |                        |                        |                        | (0.682)                | (0.276-1.686)           |
|                                    |                  |                        |                        |                        |                        |                        | P5 = 1.003<br>(2.727)  | 0.132<br>(0.740-10.051) |
| I am well informed about COVID-19. | 0.071<br>(1.073) | 0.789<br>(0.639-1.803) | E1 = -0.201<br>(0.818) | 0.777<br>(0.204-3.285) | G1 = -0.139<br>(0.870) | 0.714<br>(0.413-1.833) | P1 = -0.122<br>(0.885) | 0.821<br>(0.307-2.549)  |
|                                    |                  |                        | E2 = -0.335<br>(0.715) | 0.359<br>(0.349-1.464) | G2 = 0.257<br>(1.293)  | 0.406<br>(0.706-2.366) | P2 = -0.306<br>(0.736) | 0.536<br>(0.279-1.942)  |
|                                    |                  |                        | E3 = -0.757<br>(0.469) | 0.011<br>(0.262-0.839) |                        |                        | P3 = 0.267<br>(1.306)  | 0.559<br>(0.534-3.195)  |
|                                    |                  |                        |                        |                        |                        |                        | P4 = 0.151<br>(1.163)  | 0.748<br>(0.462-2.929)  |
|                                    |                  |                        |                        |                        |                        |                        | P5 = -0.102<br>(0.903) | 0.869<br>(0.270-3.023)  |

144

\*E1 = other ethnics; E2 = Indian; E3 = Chinese; G1 = twinning program; G2 = overseas; P1= 1<sup>st</sup> posting; P2 = 2<sup>nd</sup> posting; P3= 3<sup>rd</sup> posting; P4 = 4<sup>th</sup> posting; P5 = 5<sup>th</sup> posting; PPE: personal protective equipment

## 145 **Medical Training Progress**

146 From the survey, majority of the medical interns who graduated from overseas think that they  
147 are lack of skill [p = 0.005, OR = 2.228 (95% CI 1.273 - 3.901)] and need more surgical  
148 procedures [p = 0.029, OR = 1.871 (95% CI 1.064 - 3.288)] Surprisingly, male medical  
149 interns do not think they are lack of experience in hands-on skills [p = 0.001, OR = 0.431 (95%  
150 CI 0.262 - 0.707)] and do not need more surgery operations [p= 0.024, OR = 0.567 (95% CI  
151 0.347 - 0.928)]; Indians also think do not think they lack of skill [p = 0.031, OR = 0.476 (95%  
152 CI 0.242 - 0.936)] Based on number of posting, third posting do not think they lack of  
153 experience too[p = 0.040, OR = 0.423 (95% CI 0.186 - 0.9610)]. And junior medical interns  
154 (first and second posting) do not feel they need more surgical operations [ (P1) p = 0.024, OR  
155 = 0.327 (95% CI 0.124 - 0.861)/ (P2) p = 0.009, OR = 0.308 (95% CI 0.127 - 0.747)]  
156 During this COVID period, many Indian medical interns have learnt the importance of triage  
157 and management of patients [p = 0.024, OR = 2.175 (95% CI 1.108 - 4.270)] but not for those  
158 graduated from overseas [p = 0.010, OR = 0.484 (95% CI 0.278 - 0.842)] and fourth posting  
159 medical interns [p = 0.020, OR = 0.345 (95% CI 0.141 - 0.844)]  
160 Many are satisfied with online teaching, especially third posting [p = 0.005, OR = 3.411 (95%  
161 CI 1.455 - 7.996)] and they think there is adequate of bedside teaching [p = 0.023, OR =  
162 0.382 (95% CI 0.166 - 0.875)]

163

## 164 **Preparedness in Handling Pandemic Situation**

165 Most guys think PPE are readily available for medical interns [p = 0.019, OR = 0.561 (95%  
166 CI 0.347 - 0.908)] On the other hands, medical interns from third posting feel that by wearing  
167 PPE it will prevent them from infection [p = 0.044, OR = 0.424 (95% CI 0.184 - 0.977)] but  
168 Indian medical students do not think so [p = 0.025, OR = 2.189 (95% CI 1.104 - 4.340)]

169 Medical interns who graduated from overseas think the time of the junior staffs and resources  
170 are wasted [ $p = 0.000$ , OR = 2.843 (95%CI 1.606 - 5.033)] while some of think they are  
171 involved in many non-clinical stuff during this pandemic, especially Chinese [ $p = 0.003$ , OR  
172 = 2.232 (95% CI 1.305 - 3.819)]

173 From the survey, we noticed most of the medical interns feel they are physically fit for this  
174 pandemic, especially Chinese and Indians [ (Chinese)  $p = 0.012$ , OR = 0.404 (95% CI 0.198 -  
175 0.822)/ (Indian)  $p = 0.034$ , OR = 0.555 (95% CI 0.322 - 0.958)] Most of the medical interns  
176 who graduated from overseas think they are ready to be frontliners [ $p = 0.025$ , OR = 1.924  
177 (95% CI 1.085 - 3.411)] but junior medical interns from first and second posting feel they are  
178 not ready to be frontliners yet [ (P1)  $p = 0.029$ , OR = 0.328 (95% CI 0.121 - 0.890)/ (P2)  
179  $p=0.002$ , OR = 0.234 (95% CI 0.093 - 0.587)]

180 For the dissemination of information during this pandemic crisis, majority of Chinese  
181 medical interns think the distribution is unclear [ $p = 0.015$ , OR = 0.506 (95% CI 0.292 -  
182 0.875)] and they are not well- informed [ $p = 0.011$ , OR = 0.469 (95% CI 0.262 - 0.839)].  
183 However, medical interns who graduated from overseas do not think so [ $p = 0.004$ , OR =  
184 2.321 (95% CI 1.300 - 4.143)] Most of the medical interns think they are not given an  
185 opportunity to voice out their opinion except third posting [ $p = 0.039$ , OR = 0.424 (95% CI  
186 0.188 - 0.957)]. Unfortunately, many of them do not agree with the statement of “I am willing  
187 to carry out the instructions given, knowing that these are well thought of by the  
188 administrator” especially second posting [ $P = 0.036$ , OR = 0.361 (95% CI 0.139 - 0.936)]  
189 Senior medical interns especially fifth posting do not think they are being sent out as the  
190 frontlines as they are the most junior staff [ $p = 0.004$ , OR = 0.170 (95% CI 0.051 - 0.566)]

191

192

193

194 **Discussion**

195

196 House Officers (HO) are medical interns who just graduated from medical colleges or  
197 universities. In Malaysia, they will undergo two years of internship and be assigned to six  
198 different postings with duration of 4 months for each posting. The purpose of these two-year  
199 training is to equip them with sufficient clinical skills and experiences to manage patients.  
200 Without completion of training, they are not allowed to practice medicine. Being part of the  
201 training is stressful as they must go through different fields and learn to manage patients in  
202 respective fields within limited time. Furthermore, they have pressures from superiors,  
203 expectation from patients and requirements to be fulfilled by performing numbers of basic  
204 procedures within that short period of time. [13, 14]

205

206 COVID-19 pandemic has affected all HCW greatly in terms of routine ward rounds, elective  
207 operations and clinic arrangement, and disrupted the healthcare system. Additionally, they are  
208 suffering from immense stresses as they are worried of contracting the virus while treating  
209 the patients.[16-18] In addition, educational training and medical teaching session have  
210 ceased until further notice.[9, 11, 19] Hands-on workshops and conferences are prohibited  
211 during this pandemic period. They had inadequate cases and procedures to observe; facing  
212 lack of experience and hands-on clinical skills; being re-allocated depending on capacity and  
213 workload of the hospital. [5, 10]Facing tremendous uncertainties during this pandemic crisis,  
214 medical interns as the junior most doctors face far more pressures than other HCW.

215

216 **Medical Training Progress**

217 During COVID pandemic, many surgeries include elective operations have been rescheduled  
218 to accommodate COVID patients. Thus, less patients will be admitted for surgeries which

219 lead to less procedures and operations. [6, 10] Many medical interns who are graduated from  
220 overseas feel that they lack experience and wish for more hands-on procedures. They realised  
221 the importance of training for their future undertakings as well as being a qualified doctor  
222 requires not only knowledge, but clinical skills too. Presence of such thoughts might attribute  
223 to their early exposure to modern medicine overseas which have broadened their views and  
224 increased the level of maturity. However, some medical interns do not think they lack  
225 experience and thus do not need more procedures or operations, mainly first year male  
226 medical interns. The reasons of junior medical interns do not feel they need more surgical  
227 procedures could be because they are still new to the medical field and do not understand the  
228 expectation of their trainings. Overwhelming workload during this COVID-19 season has  
229 dampened their interests.

230

231 As for educational teaching, third posting medical interns are satisfied with both online and  
232 bedside teaching conducted by seniors and lecturers. Most of them have adapted to the new  
233 routine ward round and thus, they find it convenient to join the teaching sessions especially in  
234 less hectic postings such as anaesthesiology and emergency departments. Thus, they can join  
235 the teaching sessions and attained work-learning balance during this period.

236

### 237 **Preparedness in Handling Pandemic Situation**

238 Most of the medical interns think they are fit and ready to be part of the frontlines in dealing  
239 with COVID cases.[20] On contrary, junior medical interns, especially first posting, do not  
240 feel that they are ready yet. This could be explained as they are new to the system and lack of  
241 knowledge as well as clinical skills. They are still learning and adapting to current healthcare  
242 system. However, COVID-19 complicates the process and might demotivate the junior  
243 medical interns.

244

245 Some medical interns feel like their time and resources are wasted while others feel that they  
246 have involved in many non-clinical activities during this period. As a measure to protect  
247 medical interns and prevent local transmission between HCW, they are allocated in different  
248 clusters to handle different tasks which include ward rounds, rescheduling elective operations  
249 and clinic administration, data entry for census or research study and assisting Medical  
250 Officers in emergency department. Some might feel they should be in the “battlefields” with  
251 others in handling COVID cases. This shows most of the medical interns are enthusiastic to  
252 be part of the frontlines.

253

254 During a pandemic attack, dissemination of information is important as it provides the latest  
255 updates and possible measures to counter any problems faced. [21] Some medical interns feel  
256 that the information is unclear, and they are not being updated with the latest news. The  
257 reasons of having vague information of COVID-19 are contributed by the facts that the viral  
258 outbreak strikes rapidly across worldwide with the presence of different strains, making it  
259 difficult to completely understand its nature in a short period of time. Additionally,  
260 transmission of information from higher authorities to respective COVID centres does not  
261 keep up with the speed of viral spread. Up to date, there are still no vaccine or medicine to  
262 treat it. Most of the treatments focus on supportive management and this has shaken the  
263 confidence of HCW, including medical interns. In addition, they are not given chances to  
264 voice out their ideas and thoughts. Most of the time, ad-hoc plans and measures are  
265 channelled down by the higher authorities without clear explanation which might lead to the  
266 unsatisfaction among medical interns. Thus, some medical interns are not willing to abide the  
267 rules set by their superiors.

268



269 Fortunately, many feel that PPE is readily available even for junior staffs and they feel secure  
270 by wearing those PPE. Most of the countries suffer from limited resources due to the sudden  
271 demands worldwide. In dire situation, many HCW could not even have access to PPE while  
272 attending patients. [3, 22] Government and higher authorities have managed our resources  
273 well, ensuring equal distribution of the PPE so that all HCW are able to protect themselves  
274 during the treatment of the patients.

275

### 276 **Limitation**

277

278 1) This is a pilot study where the questionnaire is not validated. The questionnaire is  
279 created based on problems encountered by medical interns during their daily routines.

280

281 2) As for the sample size, only 236 medical interns participate in this study with the  
282 initial calculated sample size of 378. This contributes to 63% of response rate[23][24] There  
283 are few problems identified which are some of the medical interns have finished their  
284 internship and had switched to other hospitals or awaiting placement; some of them are in the  
285 transition of switching departments; invalid email addresses; possibility of busy working  
286 schedules or being too preoccupied with their routine works.

287

288 3) In addition, this is a self-administered questionnaire in anonymity where repetition of  
289 entry is possible. Follow-up study could be helpful in assessing the progression of medical  
290 interns after COVID-19 pandemic subsides.

291

292

293

294 **Conclusion**

295 COVID-19 pandemic has invaded many countries and paralysed most of the  
296 healthcare systems. During this challenging period, medical training for medical interns are  
297 affected.

298 Based on the results, medical interns are concerned of their competency as their  
299 medical trainings are affected during this pandemic crisis. For educational teaching,  
300 continuous medical educations (CME) should be continued in the form of online teaching. [9,  
301 23] Various online applications could be used to provide effective teaching with good  
302 interaction between the educators and medical interns. By using similar methods, simulated  
303 procedures could be applied too. Bedside clinical teaching should be continued with some  
304 modification such as forming a smaller group of medical interns with adequate PPE and  
305 adherence to hand hygiene.[24] Introduction of non-clinical activities such as research and  
306 census are important but should not be an obstacle for the medical interns to learn and  
307 contribute to this pandemic.

308 As for the preparedness amongst medical interns in pandemic crisis, most of the  
309 medical interns think they are ready and should be included as part of the team.[20] They  
310 should be given a chance to join forces with other HCW in battling COVID-19.  
311 Encouragement and support should be provided to promote their growth in medicine without  
312 neglecting their safety and well-being. [25] With a proper guidance and distribution of  
313 information, we could turn this pandemic into an opportunity for them to learn and grow as  
314 they will be our future ray of hope if another pandemic strikes

315 In a nutshell, the impact of COVID-19 amongst medical interns is significant and  
316 should be addressed appropriately. Their overall well-being should be protected and  
317 preserved without jeopardise their trainings and preparation for pandemic crisis in the future.

318

319 **Acknowledgement**

320

321 I sincerely would like to thank everyone who has contributed to this study. A heartfelt  
322 gratitude to all parties in helping to make this study a success:

323 1) House Officer Coordinators from different departments in UMMC

324 2) Human Resource Officers UMMC

325 3) Dr Retnagowri A/P Rajadram, Senior Lecturer, Research Unit,  
326 Department of Surgery, UMMC, Malaysia

327 4) Professor Dr April Roslani, Head of Department of Surgery, UMMC, Malaysia

328 5) Professor Dr. Tunku Kamarul Zaman Bin Tunku Zainol Abidin, Director of UMMC,  
329 Malaysia

330

331

332

333

334

335

336

337

338

339

340

341

342

343

344 **Reference**

345

346 1. WHO. *Rolling updates on coronavirus disease (COVID-19)*. WHO 2020.

347 2. Wu, Z. and J.M. McGoogan, *Characteristics of and Important Lessons From the Coronavirus*  
348 *Disease 2019 (COVID-19) Outbreak in China: Summary of a Report of 72314 Cases From the*  
349 *Chinese Center for Disease Control and Prevention*. JAMA, 2020.

350 3. Emanuel, E.J., et al., *Fair Allocation of Scarce Medical Resources in the Time of Covid-19*. N  
351 Engl J Med, 2020. **382**(21): p. 2049-2055.

352 4. Tang, K.H.D., *Movement control as an effective measure against Covid-19 spread in Malaysia:*  
353 *an overview*. Journal of Public Health, 2020.

354 5. Kaye, K., et al., *Elective, Non-urgent Procedures and Aesthetic Surgery in the Wake of SARS-*  
355 *COVID-19: Considerations Regarding Safety, Feasibility and Impact on Clinical Management*.  
356 *Aesthetic Plast Surg*, 2020.

357 6. Tay, K., et al., *COVID-19 in Singapore and Malaysia: Rising to the Challenges of Orthopaedic*  
358 *Practice in an Evolving Pandemic*. Malays Orthop J, 2020. **14**(2).

359 7. Al-Jabir, A., et al., *Impact of the Coronavirus (COVID-19) pandemic on surgical practice - Part*  
360 *1 (Review Article)*. Int J Surg, 2020.

361 8. Pather, N., et al., *Forced Disruption of Anatomy Education in Australia and New Zealand: An*  
362 *Acute Response to the Covid-19 Pandemic*. Anat Sci Educ, 2020. **13**(3): p. 284-300.

363 9. Li, L., Q. Xv, and J. Yan, *COVID-19: the need for continuous medical education and training*.  
364 *Lancet Respir Med*, 2020. **8**(4): p. e23.

365 10. Liang, Z.C., S.B.S. Ooi, and W. Wang, *Pandemics and Their Impact on Medical Training:*  
366 *Lessons From Singapore*. Acad Med, 2020.

367 11. Dedeilia, A., et al., *Medical and Surgical Education Challenges and Innovations in the COVID-*  
368 *19 Era: A Systematic Review*. In Vivo, 2020. **34**(3 Suppl): p. 1603-1611.

369 12. Ministry of Health, M., *Housemanship*. 2016.

- 370 13. Gopalakrishnan, U., Affan, Zamri, Kamal, Sandheep *Stress perceived by houseman in a*  
371 *hospital in northern Malaysia*. The Medical Journal of Malaysia, 2016. **71(1):8-11**(71(1):8-11).
- 372 14. Al-Dubai, S.A., et al., *Emotional burnout, perceived sources of job stress, professional*  
373 *fulfillment, and engagement among medical residents in Malaysia*. ScientificWorldJournal,  
374 2013. **2013**: p. 137620.
- 375 15. Ministry of Health, M., *Covid-19: 1,000 housemen to be stationed nationwide to support*  
376 *medical staff*. The Star, Saturday, 14 Mar 2020.
- 377 16. Tan, B.Y.Q., et al., *Psychological Impact of the COVID-19 Pandemic on Health Care Workers in*  
378 *Singapore*. Ann Intern Med, 2020.
- 379 17. Zhang, W.R., et al., *Mental Health and Psychosocial Problems of Medical Health Workers*  
380 *during the COVID-19 Epidemic in China*. Psychother Psychosom, 2020: p. 1-9.
- 381 18. Wong, J.E.L., Y.S. Leo, and C.C. Tan, *COVID-19 in Singapore-Current Experience: Critical*  
382 *Global Issues That Require Attention and Action*. JAMA, 2020.
- 383 19. Kogan, M., et al., *Orthopaedic Education During the COVID-19 Pandemic*. J Am Acad Orthop  
384 Surg, 2020. **28**(11): p. e456-e464.
- 385 20. Gallagher, T.H. and A.M. Schleyer, *"We Signed Up for This!" - Student and Trainee Responses*  
386 *to the Covid-19 Pandemic*. N Engl J Med, 2020.
- 387 21. Maunula, L., *The pandemic subject: Canadian pandemic plans and communicating with the*  
388 *public about an influenza pandemic*. Healthc Policy, 2013. **9**(Spec Issue): p. 14-25.
- 389 22. Ranney, M.L., V. Griffeth, and A.K. Jha, *Critical Supply Shortages - The Need for Ventilators*  
390 *and Personal Protective Equipment during the Covid-19 Pandemic*. N Engl J Med, 2020.  
391 **382**(18): p. e41.
- 392 23. Ahmed, H., M. Allaf, and H. Elghazaly, *COVID-19 and medical education*. Lancet Infect Dis,  
393 2020. **20**(7): p. 777-778.

- 394 24. Newman, N.A. and O.M. Lattouf, *Coalition for medical education-A call to action: A*  
395 *proposition to adapt clinical medical education to meet the needs of students and other*  
396 *healthcare learners during COVID-19*. J Card Surg, 2020. **35**(6): p. 1174-1175.
- 397 25. Aiello, A., et al., *Resilience training for hospital workers in anticipation of an influenza*  
398 *pandemic*. J Contin Educ Health Prof, 2011. **31**(1): p. 15-20.
- 399
